# Supplementary material
Source: Elsevier journal article supplement (https://repository.kaust.edu.sa/bitstream/handle/10754/621878/mmc1.doc?isAllowed=n)
Supplement: mmc1 [file mmc1.doc]

**Figure S1** AFM profile of GNDs measured along the blue line of the topographic image in the inset. The profile indicates an average height of 1 nm.

**(a)**

**(b)**

**(c)**

**Figure S2** Capacitance versus gate voltage (C-V) hysteresis characteristics of the memories (a) without and (b) with GNDs respectively. The samples were measured from the negative gate bias to the positive one and then swept back from the positive gate bias to negative one. (c) The fresh and programmed C-V curves of the GND memories with NH3 plasma functionalization. The samples were programmed at Vg-VFB = 8 V for 1-ms and 1-s pulse duration.

**(a)**

**(b)**

**(c)**

**(d)**

**Figure S3** Schematic diagrams of (a) the device structure of GND-NVMs, (b) the cross-sectional plane of GND-NVMs with charge storage area colored with pink, and the energy band diagram of GND-NVMs at (c) perimeter and (d) area for charge storage respectively.

**Supplementary Note 1**: Atomic force microscopy (AFM) profile of GNDs measured along the blue line of the topographic image in the inset. The profile indicates an average height of 1 nm.

After the etch of graphene sheet by oxygen plasma and the removal of Au-NPs by potassium iodide (KI), the GNDs were obtained. The AFM topographic image of GNDs was shown in inset of **Figure S1**. From the topographic image, the bright fraction represents GNDs while the dark region is the SiO2 layer. Moreover, the diameter of GNDs is found to be approximately 20 nm, in agreement with the size of Au-NP masks. In **Figure S1**, the cross-sectional height profile along the blue line of the topographic image in inset figure shows that the average thickness of GNDs is approximately 1 nm, corresponding to mono-layered graphene with some instrumental offset induced by the AFM [1].

**Supplementary Note 2**: C-V hysteresis characteristics of the memories with and without GNDs.

**Figure S2(a) and (b)** show the capacitance versus gate voltage (*C-V*) hysteresis characteristics of the memories without and with GNDs respectively. The samples were measured from the negative gate bias to the positive one and then swept back from the positive gate bias to negative one. In **Figure S2(a)**, the memories without GNDs present a negligible hysteresis memory window even after a 6 V sweeping. For the samples with GNDs (**Figure S2(b)**), a significant hysteresis memory window is observed and the memory window increases with the increase of sweeping bias. The clockwise *C-V* hysteresis implies that the electrons are stored in the GNDs [2]. **Figure S2(c)** shows the *C-V* curves of the GND memory before and after the pulse programming. The samples were programmed at Vg-VFB=8 V for different pulse duration. It can be found that the *C-V* curves shift toward the positive direction when the programming pulse is applied, indicating that the electrons are injected from the Si substrate into the GNDs [3]. When the pulse width increases, the more shift can be achieved. By extracting the flat-band voltage shift between the samples with and without pulse applied, the memory window can be obtained, as presented in **Fig. 5(a) and (b)**.

**Supplementary Note 3**: Schematic diagrams of the device structure, the cross-sectional plane of GND-NVMs with charge storage area colored with pink, and the energy band diagram of GND-NVMs at perimeter and area for charge storage.

**Figure S3(a)** shows the schematic structure of GND-NVMs. The cross-sectional plane of GND-NVMs along the cut-plane of **Figure S3(a)** is illustrated in **Figure S3(b)**. The periphery region of the GNDs colored with pink is the major charge storage region of the GND-NVMs. The energy band diagrams of GND-NVMs at perimeter and area for charge storage are illustrated in **Figure S3(c) and (d)** respectively. When a positive gate voltage (VG)is applied, the electrons will tunnel through the 3-nm-thick SiO2 barrier and be trapped at the perimeter of GNDs. However, at the area portion of GNDs, the electrons will pass through the GNDs due to the lack of charge trapping sites and directly transport into the Al gate.

**References:**

[1] A. Gupta, G. Chen, P. Joshi, S. Tadigadapa, and P. C. Eklund, Raman Scattering from High-Frequency Phonons in Supported n-Graphene Layer Films, Nano Lett., 6 (2006) 2667.

[2] S. Huang, S. Banerjee, and S. Oda, C-V and G-V Measurements Showing Single Electron Trapping in Nanocrystalline Silicon Dot Embedded in MOS Memory Structure, *Mat. Res. Soc. Symp. Proc.*, 686 (2002) A8.8.

[3] D. Kahng and S. M. Sze, A Floating Gate and Its Application to Memory Devices, *Bell Syst. Tech. J.*, 46 (1967) 1288.
